# Supplementary material for: The Patho-Neurophysiological Basis and Treatment of Focal Laryngeal Dystonia: A Narrative Review and Two Case Reports Applying TMS over the Laryngeal Motor Cortex
Source: MDPI journal article supplement (doi:10.3390/jcm11123453), 2022-06-15
Supplement: s1 [file s1]

**Table S1: Laryngeal Dystonia-Associated Genes**

| Symbol | Gene   | Locus | Mode of inheritance | No. patients | Current age /Age of onset (years) | Sex (M/F) | Laryngeal dystonia (adductor/abductor) | Clinical presentation                                                                                                                                                          | Literature                 |
|--------|--------|-------|---------------------|--------------|-----------------------------------|-----------|----------------------------------------|--------------------------------------------------------------------------------------------------------------------------------------------------------------------------------|----------------------------|
| DYT1   | TOR1A  | 9q34  | AD                  | 2            | 48/39                             | F         | adductor                               | cervical dystonia, spasmodic dysphonia (SD) and writer's cramp                                                                                                                 | Xiao <i>et al.</i> [22]    |
|        |        |       |                     |              | 63/19                             | F         | adductor                               | SD, upper extremity action tremor                                                                                                                                              |                            |
| DYT4   | TUBB4A | 19p13 | AD                  | 9            | 30-65 range /24.1 ± 7.7           | 5F/4M     | adductor                               | generalized dystonia, upper limb tremor even after bilateral ventrolateral nuclei thalamotomy; subtle swallowing problems; gait dystonia                                       | Wilcox <i>et al.</i> [23]  |
|        |        |       |                     | 2            | 31/20                             | F         | adductor                               | whispering voice and eyelid ptosis; later on severe dysphagia requiring supplemental feeding through a percutaneous endoscopic gastrostomy (PEG) tube; "hobby horse" type gait | Lohmann <i>et al.</i> [24] |
|        |        |       |                     |              | 71/60                             | F         | adductor                               | SD, oromandibular dystonia and Dyskinesia                                                                                                                                      |                            |

|      |       |      |    |   |       |   |                |                                                                                              |                             |
|------|-------|------|----|---|-------|---|----------------|----------------------------------------------------------------------------------------------|-----------------------------|
| DYT6 | THAP1 | 8p11 | AD | 2 | 35/9  | M | *not specified | severe LD, speech problems followed by writer's dystonia, dysarthria                         | Djarmati <i>et al.</i> [25] |
|      |       |      |    |   | 68/10 | M | *not specified | writer's dystonia followed by LD                                                             |                             |
|      |       |      |    | 6 | 58/51 | F | adductor       |                                                                                              | Xiao <i>et al.</i> [26]     |
|      |       |      |    |   | 66/62 | F | adductor       |                                                                                              |                             |
|      |       |      |    |   | 63/62 | F | adductor       |                                                                                              |                             |
|      |       |      |    |   | 85/33 | F | adductor       | segmental craniocervical dystonia that included LD, blepharospasm, and lower facial dystonia |                             |
|      |       |      |    |   | 62/48 | F | adductor       |                                                                                              |                             |
|      |       |      |    |   | 75/66 | F | adductor       |                                                                                              |                             |
|      |       |      |    | 1 | 35/14 | F | adductor       | spasmodic dysphonia that spread to the oromandibular region                                  | Groen <i>et al.</i> [27]    |
|      |       |      |    | 2 | NA/14 | F | adductor       | SD with cervical and oromandibular spread                                                    | Groen <i>et al.</i> [28]    |
|      |       |      |    |   | 35/14 | F | adductor       | SD that spread to the oromandibular region, tongue dystonia                                  |                             |

|       |      |      |    |   |       |   |                |                                                                                                                                                                                                                                                       |                              |
|-------|------|------|----|---|-------|---|----------------|-------------------------------------------------------------------------------------------------------------------------------------------------------------------------------------------------------------------------------------------------------|------------------------------|
|       |      |      |    | 3 | 24/8  | M | abductor       | right arm dystonia and bilateral upper extremity dystonic tremors; mild cervical, lower facial, lingual, and masticatory dystonia                                                                                                                     | LeDoux <i>et al.</i> [29]    |
|       |      |      |    |   | 44/6  | M | abductor       | SD, blepharospasm, masticatory dystonia, lower facial dystonia, lingual dystonia, bilateral proximal arm dystonia (left > right), bilateral distal arm dystonia (right > left), truncal dystonia, and mild asymmetrical dystonia in the legs and feet |                              |
|       |      |      |    |   | 47/40 | M | abductor       | LD and bilateral dystonic arm tremors, blepharospasm and lower facial, lingual and masticatory dystonia                                                                                                                                               |                              |
|       |      |      |    | 2 | 70/24 | M | *not specified | SD                                                                                                                                                                                                                                                    | de Gusmão <i>et al.</i> [30] |
|       |      |      |    |   | NA/50 | F | *not specified | focal SD                                                                                                                                                                                                                                              |                              |
| DYT11 | SGCE | 7q21 | AD | 1 | 66/40 | M | *not specified | writer's cramp, myoclonus dystonia                                                                                                                                                                                                                    | Kumar <i>et al.</i> [31]     |
|       |      |      |    | 1 | 24/4  | M | *not specified | myoclonus dystonia with SD                                                                                                                                                                                                                            | Gultekin <i>et al.</i> [32]  |

|       |       |      |    |   |       |   |                |                                                                                                                          |                             |
|-------|-------|------|----|---|-------|---|----------------|--------------------------------------------------------------------------------------------------------------------------|-----------------------------|
| DYT16 | PRKRA | 2q31 | AR | 4 | 35/12 | M | *not specified | oromandibular dystonia, laterocollis, and upper limb dystonia, present parkinsonism                                      | Camargos <i>et al.</i> [33] |
|       |       |      |    |   | 19/2  | M | *not specified | generalised dystonia characterised by involvement of legs, hands, trunk, and voice, severe bradykinesia but no tremor    |                             |
|       |       |      |    |   | 64/18 | M | *not specified | laterocollis, right laterotrunk, SD, extension of the left leg when walking, slight bradykinesia, present parkinsonism   |                             |
|       |       |      |    |   | 48/2  | F | *not specified | combination of lower volume and strangled character suggestive of a mixed form of SD, bradykinesia, present parkinsonism |                             |
|       |       |      |    | 1 | 35/13 | M | adductor       | SD, oromandibular dystonia, and dystonic protrusion of the tongue, parkinsonism                                          | Camargos <i>et al.</i> [34] |
|       |       |      |    | 1 | 40/39 | F | *not specified | LD                                                                                                                       | Zech <i>et al.</i> [35]     |
|       |       |      |    | 2 | 43/8  | M | *not specified | SD, parkinsonism                                                                                                         | Quadri <i>et al.</i> [36]   |
|       |       |      |    |   | 38/4  | M | *not specified | dystonia of the oromandibular region (reduced by a sensory trick - a light touch on the chin), the neck                  |                             |

|                                                                                  |      |       |    |   |             |   |                |                                                                                |                                 |
|----------------------------------------------------------------------------------|------|-------|----|---|-------------|---|----------------|--------------------------------------------------------------------------------|---------------------------------|
| (laterocollis and antecollis), and both upper limbs and right foot, parkinsonism |      |       |    |   |             |   |                |                                                                                |                                 |
| DYT24                                                                            | ANO3 | 11p14 | AD | 1 | NA/NA       | F | *not specified | cervical, laryngeal, and upper-limb tremulous dystonia                         | Charlesworth <i>et al.</i> [37] |
|                                                                                  |      |       |    | 7 | 39/5        | F | *not specified | LD and mild oromandibular dystonia, blepharospasm and torticollis, head tremor | Stamelou <i>et al.</i> [38]     |
|                                                                                  |      |       |    |   | 31/6        | F | adductor       | essential tremor                                                               |                                 |
|                                                                                  |      |       |    |   | deceased/27 | F | adductor       | torticollis, head tremor                                                       |                                 |
|                                                                                  |      |       |    |   | 67/40       | M | adductor       | torticollis to the right, blepharospasm, head tremor                           |                                 |
|                                                                                  |      |       |    |   | 69/30       | M | adductor       | torticollis, blepharospasm, oromandibular, head tremor                         |                                 |
|                                                                                  |      |       |    |   | deceased/30 | F | adductor       | torticollis, head tremor                                                       |                                 |
|                                                                                  |      |       |    |   | 36/19       | F | adductor       | torticollis, head tremor                                                       |                                 |

---

|                  |               |       |    |    |           |        |                |                                                                                                                                                       |                           |
|------------------|---------------|-------|----|----|-----------|--------|----------------|-------------------------------------------------------------------------------------------------------------------------------------------------------|---------------------------|
| <b>DYT25</b>     | <i>GNAL</i>   | 18p11 | AD | 1  | 37/36     | M      | adductor       | LD                                                                                                                                                    | Putzel <i>et al.</i> [39] |
|                  |               |       |    | 1  | 42/32     | F      | *not specified | difficulty pronouncing vowels, neck dystonia, blepharospasm and writer's cramp                                                                        | Kumar <i>et al.</i> [31]  |
| <b>DYT27</b>     | <i>COL6A3</i> | 2q37  | AR | 2  | 51/20     | M      | *not specified | tremulous cervical dystonia; upper limb dystonia with dystonic action and postural tremor; writer's cramp; oromandibular dystonia; LD; trunk dystonia | Zech <i>et al.</i> [40]   |
|                  |               |       |    |    | 48/20     | F      | *not specified | tremulous cervical dystonia; upper limb dystonia with dystonic action and postural tremor; writer's cramp; oromandibular dystonia; LD                 |                           |
| <b>[2DYT 28]</b> | <i>KMT2B</i>  | 19q13 | AD | 19 | 6-46/2-23 | 10F/9M | *not specified |                                                                                                                                                       | Meyer <i>et al.</i> [41]  |

---

|    |            |         |                         |                                                                                                                            |                              |
|----|------------|---------|-------------------------|----------------------------------------------------------------------------------------------------------------------------|------------------------------|
| 1  | 28/6       | M       | *not specified          | oromandibular-laryngeal involvement and atypical gait dystonia ( <i>Charlot gait</i> )                                     | Brás <i>et al.</i> [42]      |
| 11 | 10-52/3-13 | 7F/4M   | abductor /adductor type | progressing to scarcely intelligible speech or even complete anarthria in 4 patients, oromandibular dystonia, parkinsonism | Carecchio <i>et al.</i> [43] |
| 32 | 3-44/3-19  | 18F/14M | *not specified          |                                                                                                                            | Cif <i>et al.</i> [44]       |
| 1  | 23/5       | M       | *not specified          | LD, generalized dystonia with a tremulous and twisting pattern                                                             | Kumar <i>et al.</i> [31]     |

*AD, autosomal dominant; AR, autosomal recessive; SD, spasmodic dysphonia; LD, laryngeal dystonia; NA, not available; not specified, the authors did not specify what type of dystonia is, the adductor or abductor type*

## References

- [22] Xiao, J.; Bastian, R.W.; Perlmutter, J.S.; Racette, B.A.; Tabbal, S.D., Karimi M, et al. High-throughput mutational analysis of TOR1A in primary dystonia. *BMC Medical Genetics* **2009**, 10, 24. <https://doi.org/10.1186/1471-2350-10-24>
- [23] Wilcox, R. A.; Winkler, S.; Lohmann, K.; Klein, C. Whispering dysphonia in an Australian family (DYT4): a clinical and genetic reappraisal. *Mov Disord* **2011**, 26, 2404-2408. <https://doi.org/10.1002/mds.23866>
- [24] Lohmann, K.; Wilcox, R. A.; Winkler, S.; Ramirez, A.; Rakovic, A.; Park, J. S.; Arns, B.; Lohnau, T.; Groen, J.; Kasten, M.; Brüggemann, N.; Hagenah, J.; Schmidt, A.; Kaiser, F. J.; Kumar, K. R.; Zschiedrich, K.; Alvarez-Fischer, D.; Altenmüller, E.; Ferbert, A.; Lang, A. E.; Klein, C. (2013). Whispering dysphonia (DYT4 dystonia) is caused by a mutation in the TUBB4 gene. *Ann Neurol* **2013**, 73, 537-545. 17. <https://doi.org/10.1002/ana.23829>
- [25] Djarmati, A.; Schneider, S. A.; Lohmann, K.; Winkler, S.; Pawlack, H.; Hagenah, J.; Brüggemann, N.; Zittel, S.; Fuchs, T.; Raković, A.; Schmidt, A.; Jabusch, H. C.; Wilcox, R.; Kostić, V. S.; Siebner, H.; Altenmüller, E.; Münchau, A.; Ozelius, L. J.; Klein, C. Mutations in THAP1 (DYT6) and generalised dystonia with prominent spasmodic dysphonia: a genetic screening study. *The Lancet. Neurology* **2009**, 8, 447–452. [https://doi.org/10.1016/S1474-4422\(09\)70083-3](https://doi.org/10.1016/S1474-4422(09)70083-3)
- [26] Xiao, J.; Zhao, Y.; Bastian, R. W.; Perlmutter, J. S.; Racette, B. A.; Tabbal, S. D.; Karimi, M.; Paniello, R. C.; Wszolek, Z. K.; Uitti, R. J.; Van Gerpen, J. A.; Simon, D. K.; Tarsy, D.; Hedera, P.; Truong, D. D.; Frei, K. P.; Dev Batish, S.; Blitzer, A.; Pfeiffer, R. F.; Gong, S.; ... LeDoux, M. S. Novel THAP1 sequence variants in primary dystonia. *Neurology* **2010**, 74, 229–238. <https://doi.org/10.1212/WNL.0b013e3181ca00ca>
- [27] Groen, J. L., Yildirim, E., Ritz, K., Baas, F., van Hilten, J. J., van der Meulen, F. W., Langeveld, T. P., & Tijssen, M. A. THAP1 mutations are infrequent in spasmodic dysphonia. *Mov Disord* **2011**, 26, 1952-194. <https://doi.org/10.1002/mds.23682>



- [28] Groen, J. L.; Kallen, M. C.; van de Warrenburg, B. P.; Speelman, J. D.; van Hilten, J. J.; Aramideh, M.; Boon, A. J.; Klein, C.; Koel-man, J. H.; Langeveld, T. P.; Baas, F.; Tijssen, M. A. Phenotypes and genetic architecture of focal primary torsion dystonia. *J Neurol Neurosurg Psychiatry* **2012**, *83*, 1006-1011. <https://doi.org/10.1136/jnnp-2012-302729>
- [29] LeDoux, M. S.; Xiao, J.; Rudzińska, M.; Bastian, R. W.; Wszolek, Z. K.; Van Gerpen, J. A.; Puschmann, A.; Momčilović, D.; Vemula, S. R.; Zhao, Y. Genotype-phenotype correlations in THAP1 dystonia: molecular foundations and description of new cases. *Parkinsonism Relat Disord* **2012**, *18*, 414-425. <https://doi.org/10.1016/j.parkreldis.2012.02.001>
- [30] de Gusmão, C. M.; Fuchs, T.; Moses, A.; Mulhaupt-Buell, T.; Song, P. C.; Ozelius, L. J.; Franco, R. A.; Sharma, N. Dystonia-Causing Mutations as a Contribution to the Etiology of Spasmodic Dysphonia. *Otolaryngol Head Neck Surg* **2016**, *155*, 624-628. <https://doi.org/10.1177/0194599816648293>
- [31] Kumar, K. R.; Davis, R. L.; Tchan, M. C.; Wali, G. M.; Mahant, N.; Ng, K.; Kotschet, K.; Siow, S. F.; Gu, J.; Walls, Z.; Kang, C.; Wali, G.; Levy, S.; Phua, C. S.; Yiannikas, C.; Darveniza, P.; Chang, F.; Morales-Briceño, H.; Rowe, D. B.; Drew, A.; ... Sue, C. M. (2019). Whole genome sequencing for the genetic diagnosis of heterogenous dystonia phenotypes. *Parkinsonism Relat Disord* **2019**, *69*, 111-118.. <https://doi.org/10.1016/j.parkreldis.2019.11.004>
- [32] Gultekin, M.; Prakash, N.; Ganos, C.; Mirza, M.; Bayramov, R.; Bhatia, K. P.; Mencacci, N. E. (2019). A Novel SGCE Nonsense Variant Associated With Marked Intrafamilial Variability in a Turkish Family With Myoclonus-Dystonia. *Mov Disord Clin Pract* **2019**, *6*, 479-482 <https://doi.org/10.1002/mdc3.12805>
- [33] Camargos, S.; Scholz, S.; Simón-Sánchez, J.; Paisán-Ruiz, C.; Lewis, P.; Hernandez, D.; Ding, J.; Gibbs, J. R.; Cookson, M. R.; Bras, J.; Guerreiro, R.; Oliveira, C. R.; Lees, A.; Hardy, J.; Cardoso, F.; Singleton, A. B. DYT16, a novel young-onset dystonia-parkinsonism disorder: identification of a segregating mutation in the stress-response protein PRKRA. *Lancet Neurol* **2008**, *7*, 207-215.. [https://doi.org/10.1016/S1474-4422\(08\)70022-X](https://doi.org/10.1016/S1474-4422(08)70022-X)

- [34] Camargos, S.; Lees, A. J.; Singleton, A.; Cardoso, F. DYT16: the original cases. *J Neurol Neurosurg Psychiatry*, **2012**, 83, 1012-1014. <https://doi.org/10.1136/jnnp-2012-302841>
- [35] Zech, M.; Castrop, F.; Schormair, B.; Jochim, A.; Wieland, T.; Gross, N.; Lichtner, P.; Peters, A.; Gieger, C.; Meitinger, T.; Strom, T.M.; Oexle, K.; Haslinger, B. Winkelmann, J. DYT16 revisited: Exome sequencing identifies PRKRA mutations in a European dystonia family. *Mov Disord* **2014**, 29, 1504-1510. <https://doi.org/10.1002/mds.25981>
- [36] Quadri, M.; Olgiati, S.; Sensi, M.; Gualandi, F.; Groppo, E.; Rispoli, V.; Graafland, J.; Breedveld, G. J.; Fabbrini, G.; Berardelli, A.; Bonifati, V. (2016). PRKRA Mutation Causing Early-Onset Generalized Dystonia-Parkinsonism (DYT16) in an Italian Family. *Mov Disord* **2016**, 31, 765-7. <https://doi.org/10.1002/mds.26583>
- [37] Charlesworth, G.; Plagnol, V.; Holmström, K. M.; Bras, J.; Sheerin, U. M.; Preza, E.; Rubio-Agusti, I.; Ryten, M.; Schneider, S. A.; Stamelou, M.; Trabzuni, D.; Abramov, A. Y.; Bhatia, K. P.; Wood, N. W. (2012). Mutations in ANO3 cause dominant craniocervical dystonia: ion channel implicated in pathogenesis. *Am J Hum Genet* **2012**, 91, 1041-1050. <https://doi.org/10.1016/j.ajhg.2012.10.024>
- [38] Stamelou, M.; Charlesworth, G.; Cordivari, C.; Schneider, S. A.; Kägi, G.; Sheerin, U. M.; Rubio-Agusti, I.; Batla, A.; Houlden, H.; Wood, N. W.; Bhatia, K. P. The phenotypic spectrum of DYT24 due to ANO3 mutations. *Mov Disord* **2014**, 29, 928-34. <https://doi.org/10.1002/mds.25802>.
- [39] Putzel, G. G.; Fuchs, T.; Battistella, G.; Rubien-Thomas, E.; Frucht, S. J.; Blitzer, A.; Ozelius, L. J.; Simonyan, K. GNAL mutation in isolated laryngeal dystonia. *Mov Disord* **2016**, 31, 750-755. <https://doi.org/10.1002/mds.26502>
- [40] Zech, M.; Lam, D. D.; Francescato, L.; Schormair, B.; Salminen, A. V.; Jochim, A.; Wieland, T.; Lichtner, P.; Peters, A.; Gieger, C.; Lochmüller, H.; Strom, T. M.; Haslinger, B.; Katsanis, N.; Winkelmann, J. Recessive mutations in the  $\alpha 3$  (VI) collagen gene COL6A3 cause early-onset isolated dystonia. *Am J Hum Genet* **2015**, 96, 883-893. <https://doi.org/10.1016/j.ajhg.2015.04.010>

- [41] Meyer, E.; Carss, K. J.; Rankin, J.; Nichols, J. M.; Grozeva, D.; Joseph, A. P.; Mencacci, N. E.; Papandreou, A.; Ng, J.; Barral, S.; Ngoh, A.; Ben-Pazi, H.; Willemsen, M. A.; Arkadir, D.; Barnicoat, A.; Bergman, H.; Bhate, S.; Boys, A.; Darin, N.; Foulds, N.; Kurian, M. A. (2017). Mutations in the histone methyltransferase gene KMT2B cause complex early-onset dystonia. *Nat Genet* **2017**, 49, 223-237. <https://doi.org/10.1038/ng.3740>
- [42] Brás, A.; Ribeiro, J. A.; Sobral, F.; Moreira, F.; Morgadinho, A.; Januário, C. Early-onset oromandibular-laryngeal dys-tonia and Charlot gait: New phenotype of DYT-KMT2B. *Neurology* **2019**, 92, 919. <https://doi.org/10.1212/WNL.0000000000007469>
- [43] Carecchio, M.; Invernizzi, F.; González-Latapi, P.; Panteghini, C.; Zorzi, G.; Romito, L.; Leuzzi, V.; Galosi, S.; Reale, C.; Zibordi, F.; Joseph, A.P.; Topf, M.; Piano, C.; Bentivoglio, A.R.; Girotti, F.; Morana, P.; Morana, B.; Kurian, M.A.; Garavaglia, B.; Mencacci, N.E.; Lubbe, S.J.; Nardocci, N. Frequency and phenotypic spectrum of KMT2B dystonia in childhood: A single-center cohort study. *Mov Disord* **2019**, 34, 1516-1527. <https://doi.org/10.1002/mds.27771>
- [44] Cif, L.; Demailly, D.; Lin, J. P.; Barwick, K. E.; Sa, M.; Abela, L.; Malhotra, S.; Chong, W. K.; Steel, D.; Sanchis-Juan, A.; Ngoh, A.; Trump, N.; Meyer, E.; Vasques, X.; Rankin, J.; Allain, M. W.; Applegate, C. D.; Attaripour Isfahani, S.; Baleine, J.; Balint, B.; ... Kurian, M. A. KMT2B-related disorders: expansion of the phenotypic spectrum and long-term efficacy of deep brain stimulation. *Brain* 2020, 143, 3242-3261. <https://doi.org/10.1093/brain/awaa304>
